# Supplementary material
Source: Springer Nature journal article supplement (https://www.springermedizin.de/resource/supplementary/12890_2011_287_MOESM1_ESM.pdf/9504874)

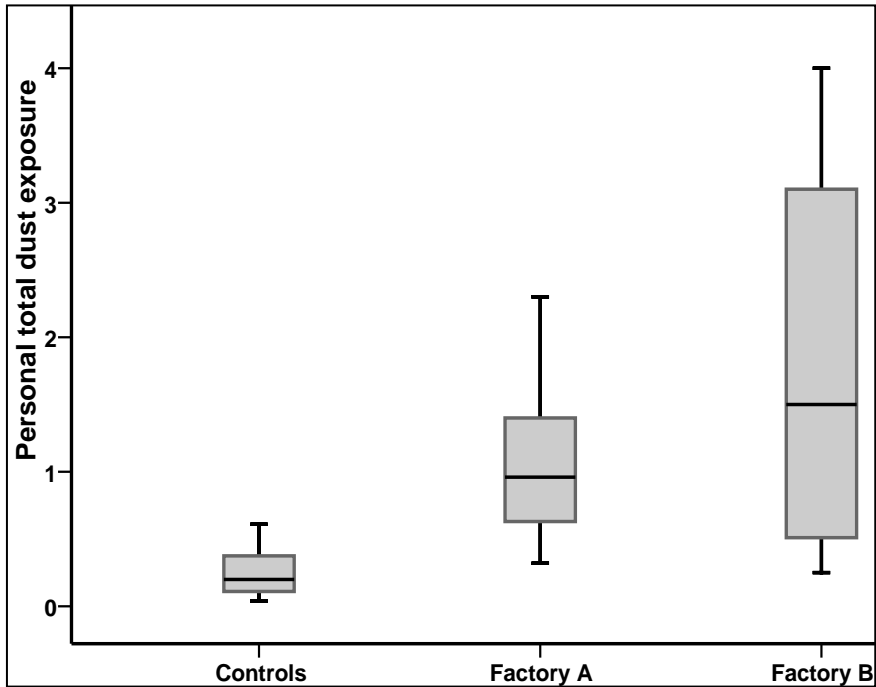

Supplement: MOESM1 [file 9504874]
